# Supplementary material for: Developing clinical prediction models when adhering to minimum sample size recommendations: The importance of quantifying bootstrap variability in tuning parameters and predictive performance
Source: PubMed Central journal article supplement (PMC8649413; doi:10.1177/09622802211046388), 2021-10-08
Supplement: sj-pdf-1-smm-10.1177_09622802211046388.pdf [file sj-pdf-1-smm-10.1177_09622802211046388.pdf]

## Supplementary Material

### Developing Clinical Prediction Models when adhering to minimum sample size recommendations: the importance of quantifying bootstrap variability in tuning parameters and predictive performance

Glen P. Martin; Richard D. Riley; Gary S. Collins; Matthew Sperrin

## Supplementary Tables

*Supplementary Table 1: Summary of the minimum required sample sizes, across each simulation scenario. See Table 1 in the main paper for the numbering of each simulation scenario*

| <b>Simulation Scenario</b> | <b>median</b> | <b>mean</b> | <b>min</b> | <b>max</b> | <b>Sample Size Criteria</b> |
|----------------------------|---------------|-------------|------------|------------|-----------------------------|
| 1                          | 551           | 551         | 544        | 559        | Uniquely criteria 1         |
| 2                          | 970           | 970         | 952        | 990        | Uniquely criteria 1         |
| 3                          | 385           | 385         | 385        | 385        | Uniquely criteria 3         |
| 4                          | 655           | 655         | 645        | 666        | Uniquely criteria 1         |
| 5                          | 898           | 898         | 898        | 898        | Uniquely criteria 1         |
| 6                          | 898           | 898         | 898        | 898        | Uniquely criteria 1         |
| 7                          | 749           | 749         | 749        | 749        | Uniquely criteria 1         |
| 8                          | 749           | 749         | 749        | 749        | Uniquely criteria 1         |

*Supplementary Table 2: The median (2.5% and 97.5% quantile) of the calibration-in-the-large for each analytical method, upon validation, across the 500 iterations for each simulation scenario. See Table 1 in the main paper for the numbering of each simulation scenario*

| <b>Simulation Scenario</b> | <b>MLE</b>          | <b>Uniform closed-form</b> | <b>Uniform bootstrap</b> | <b>Firths</b>       | <b>LASSO</b>        | <b>Repeat CV LASSO</b> | <b>Ridge</b>        | <b>Repeat CV Ridge</b> |
|----------------------------|---------------------|----------------------------|--------------------------|---------------------|---------------------|------------------------|---------------------|------------------------|
| 1                          | -0.01 (-0.23, 0.27) | -0.01 (-0.22, 0.26)        | -0.01 (-0.22, 0.25)      | -0.01 (-0.23, 0.26) | 0.00 (-0.23, 0.25)  | 0.00 (-0.22, 0.25)     | -0.01 (-0.22, 0.25) | -0.01 (-0.22, 0.25)    |
| 2                          | 0.00 (-0.16, 0.17)  | 0.00 (-0.17, 0.17)         | 0.00 (-0.17, 0.17)       | 0.00 (-0.16, 0.17)  | 0.00 (-0.17, 0.16)  | 0.00 (-0.17, 0.16)     | 0.00 (-0.17, 0.17)  | 0.00 (-0.17, 0.17)     |
| 3                          | -0.01 (-0.25, 0.24) | -0.01 (-0.23, 0.23)        | -0.01 (-0.23, 0.23)      | -0.01 (-0.24, 0.23) | -0.01 (-0.23, 0.22) | -0.01 (-0.23, 0.23)    | -0.01 (-0.23, 0.23) | -0.01 (-0.22, 0.23)    |
| 4                          | 0.00 (-0.18, 0.17)  | 0.00 (-0.17, 0.17)         | 0.00 (-0.17, 0.17)       | 0.00 (-0.18, 0.17)  | 0.00 (-0.17, 0.17)  | 0.00 (-0.16, 0.18)     | 0.00 (-0.17, 0.17)  | 0.00 (-0.17, 0.17)     |
| 5                          | 0.00 (-0.17, 0.20)  | 0.00 (-0.17, 0.19)         | 0.00 (-0.17, 0.19)       | 0.00 (-0.17, 0.19)  | 0.00 (-0.17, 0.19)  | 0.00 (-0.17, 0.19)     | 0.00 (-0.17, 0.19)  | 0.00 (-0.17, 0.19)     |
| 6                          | 0.00 (-0.17, 0.18)  | 0.00 (-0.17, 0.18)         | 0.00 (-0.17, 0.18)       | 0.00 (-0.17, 0.18)  | 0.00 (-0.16, 0.17)  | 0.00 (-0.16, 0.17)     | 0.00 (-0.16, 0.18)  | 0.00 (-0.16, 0.18)     |
| 7                          | 0.00 (-0.17, 0.15)  | 0.00 (-0.16, 0.15)         | 0.00 (-0.16, 0.15)       | 0.00 (-0.17, 0.15)  | 0.00 (-0.16, 0.15)  | 0.00 (-0.16, 0.15)     | 0.00 (-0.16, 0.15)  | 0.00 (-0.16, 0.15)     |
| 8                          | 0.01 (-0.14, 0.17)  | 0.01 (-0.13, 0.16)         | 0.01 (-0.13, 0.16)       | 0.01 (-0.13, 0.16)  | 0.00 (-0.13, 0.16)  | 0.00 (-0.13, 0.16)     | 0.01 (-0.13, 0.16)  | 0.01 (-0.13, 0.16)     |

Supplementary Table 3: The median (2.5% and 97.5% quantile) of the Cox-Snell R2 for each analytical method, upon validation, across the 500 iterations for each simulation scenario. See Table 1 in the main paper for the numbering of each simulation scenario

| <b>Simulation Scenario</b> | <b>MLE</b>        | <b>Uniform closed-form</b> | <b>Uniform bootstrap</b> | <b>Firths</b>     | <b>LASSO</b>      | <b>Repeat CV LASSO</b> | <b>Ridge</b>      | <b>Repeat CV Ridge</b> |
|----------------------------|-------------------|----------------------------|--------------------------|-------------------|-------------------|------------------------|-------------------|------------------------|
| 1                          | 0.13 (0.11, 0.14) | 0.14 (0.12, 0.15)          | 0.14 (0.12, 0.15)        | 0.14 (0.12, 0.14) | 0.14 (0.12, 0.14) | 0.14 (0.12, 0.15)      | 0.14 (0.12, 0.15) | 0.14 (0.12, 0.15)      |
| 2                          | 0.08 (0.07, 0.08) | 0.08 (0.07, 0.09)          | 0.08 (0.07, 0.09)        | 0.08 (0.07, 0.09) | 0.08 (0.07, 0.09) | 0.08 (0.07, 0.09)      | 0.08 (0.07, 0.09) | 0.08 (0.07, 0.09)      |
| 3                          | 0.19 (0.16, 0.20) | 0.19 (0.17, 0.20)          | 0.19 (0.17, 0.20)        | 0.19 (0.16, 0.20) | 0.19 (0.17, 0.20) | 0.19 (0.17, 0.20)      | 0.19 (0.17, 0.20) | 0.19 (0.17, 0.20)      |
| 4                          | 0.12 (0.10, 0.12) | 0.12 (0.10, 0.12)          | 0.12 (0.10, 0.12)        | 0.12 (0.10, 0.12) | 0.12 (0.11, 0.12) | 0.12 (0.11, 0.12)      | 0.12 (0.10, 0.12) | 0.12 (0.10, 0.12)      |
| 5                          | 0.14 (0.13, 0.15) | 0.14 (0.13, 0.15)          | 0.14 (0.13, 0.15)        | 0.14 (0.13, 0.15) | 0.14 (0.13, 0.15) | 0.14 (0.13, 0.15)      | 0.14 (0.13, 0.15) | 0.14 (0.13, 0.15)      |
| 6                          | 0.08 (0.07, 0.08) | 0.08 (0.07, 0.09)          | 0.08 (0.07, 0.08)        | 0.08 (0.07, 0.08) | 0.08 (0.07, 0.09) | 0.08 (0.07, 0.09)      | 0.08 (0.07, 0.08) | 0.08 (0.07, 0.08)      |
| 7                          | 0.20 (0.19, 0.21) | 0.20 (0.19, 0.21)          | 0.20 (0.19, 0.21)        | 0.20 (0.19, 0.20) | 0.20 (0.19, 0.20) | 0.20 (0.19, 0.20)      | 0.20 (0.19, 0.21) | 0.20 (0.19, 0.21)      |
| 8                          | 0.12 (0.10, 0.12) | 0.12 (0.11, 0.12)          | 0.12 (0.11, 0.12)        | 0.12 (0.10, 0.12) | 0.12 (0.11, 0.12) | 0.12 (0.11, 0.12)      | 0.12 (0.11, 0.12) | 0.12 (0.11, 0.12)      |



## Supplementary Figures

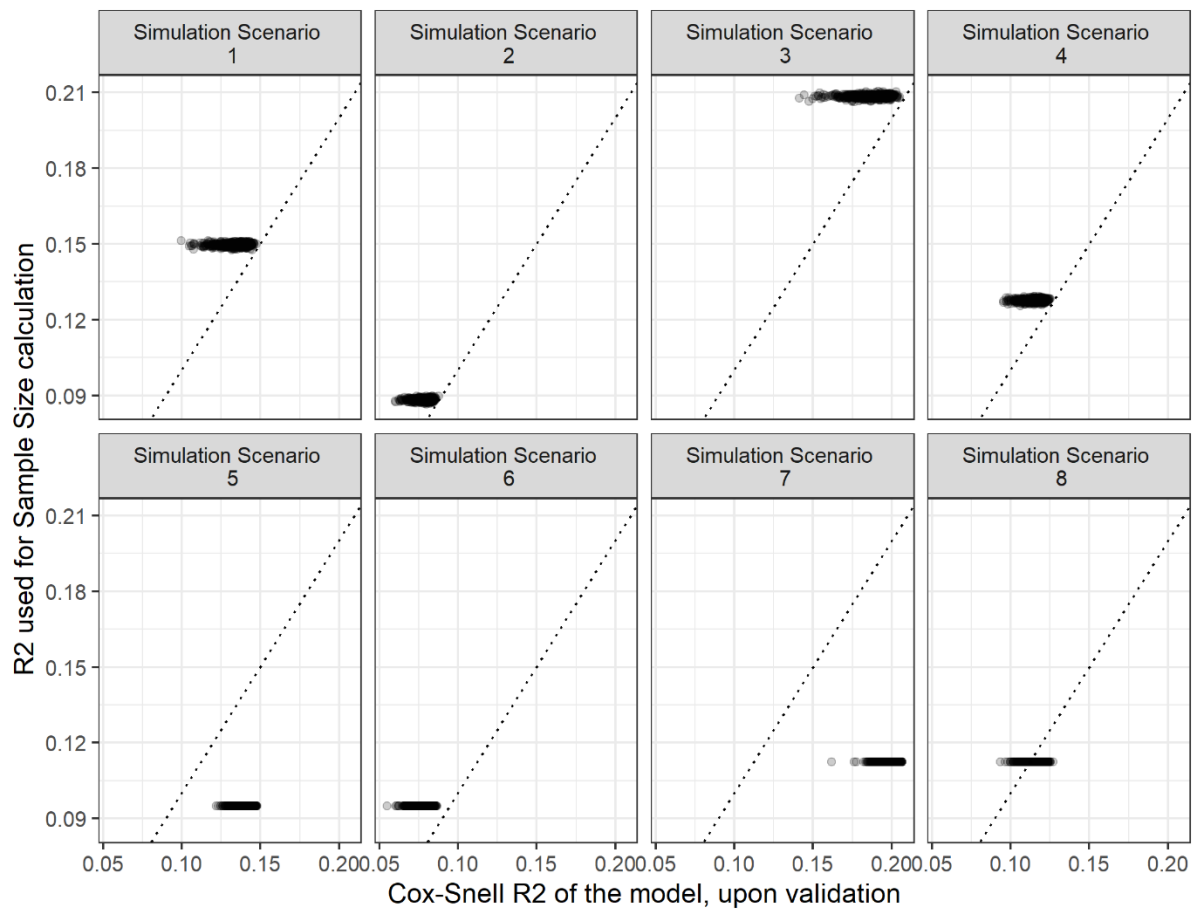

*Supplementary Figure 1: Scatter plots of the Cox-Snell R2 that was used within the sample size calculations for the simulation study, against the Cox-Snell R2 achieved for the prediction models estimated by MLE, upon validation. Each panel represents a given simulation scenario; the numbering of simulation scenarios is given in Table 1.*

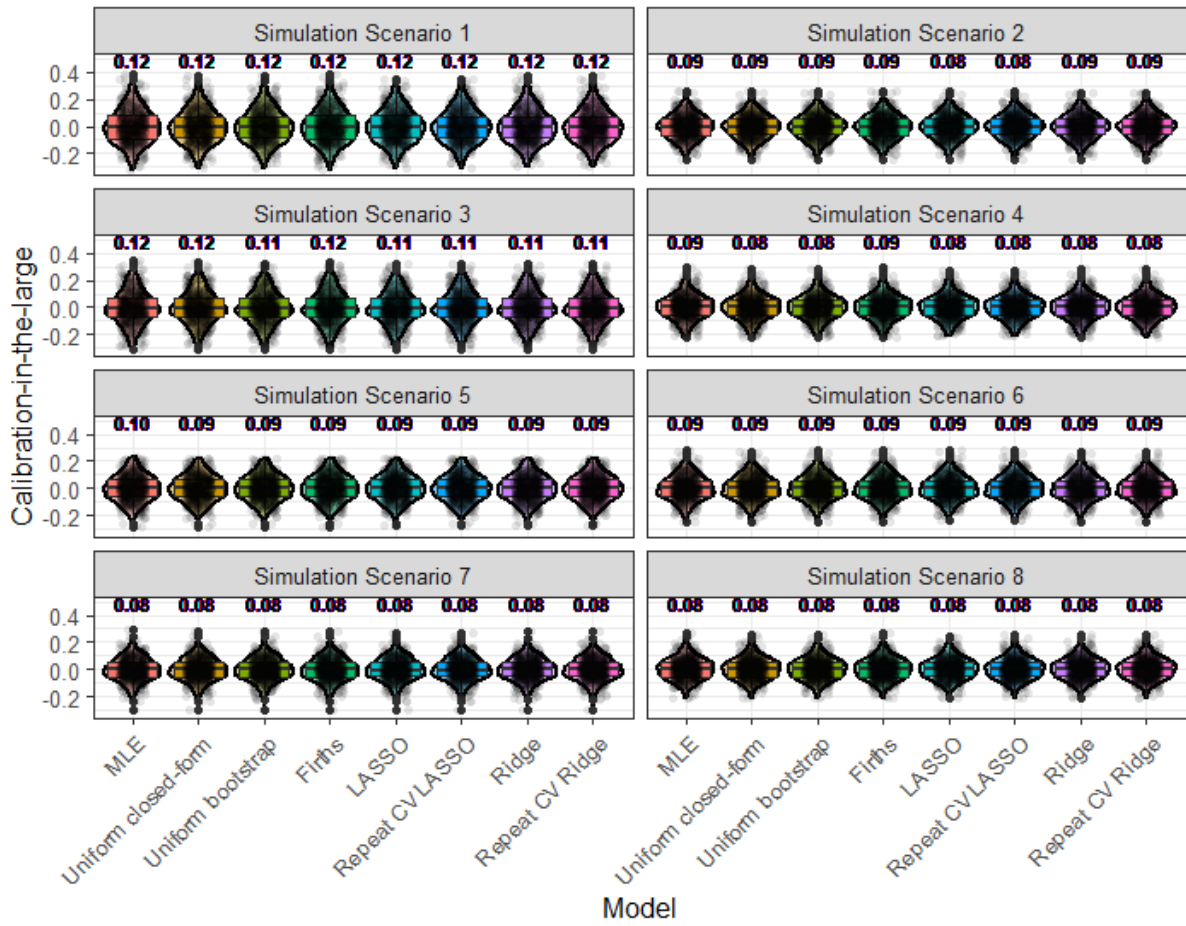

Supplementary Figure 2: Boxplot and violin plot showing the distribution, across iterations, of the calibration-in-the-large, upon validation. The numbers above each plot show the root-mean-square deviation of the calibration-in-the-large. Random jitter has been applied to each point to aid visual clarity. The numbering of simulation scenarios is given in Table 1.

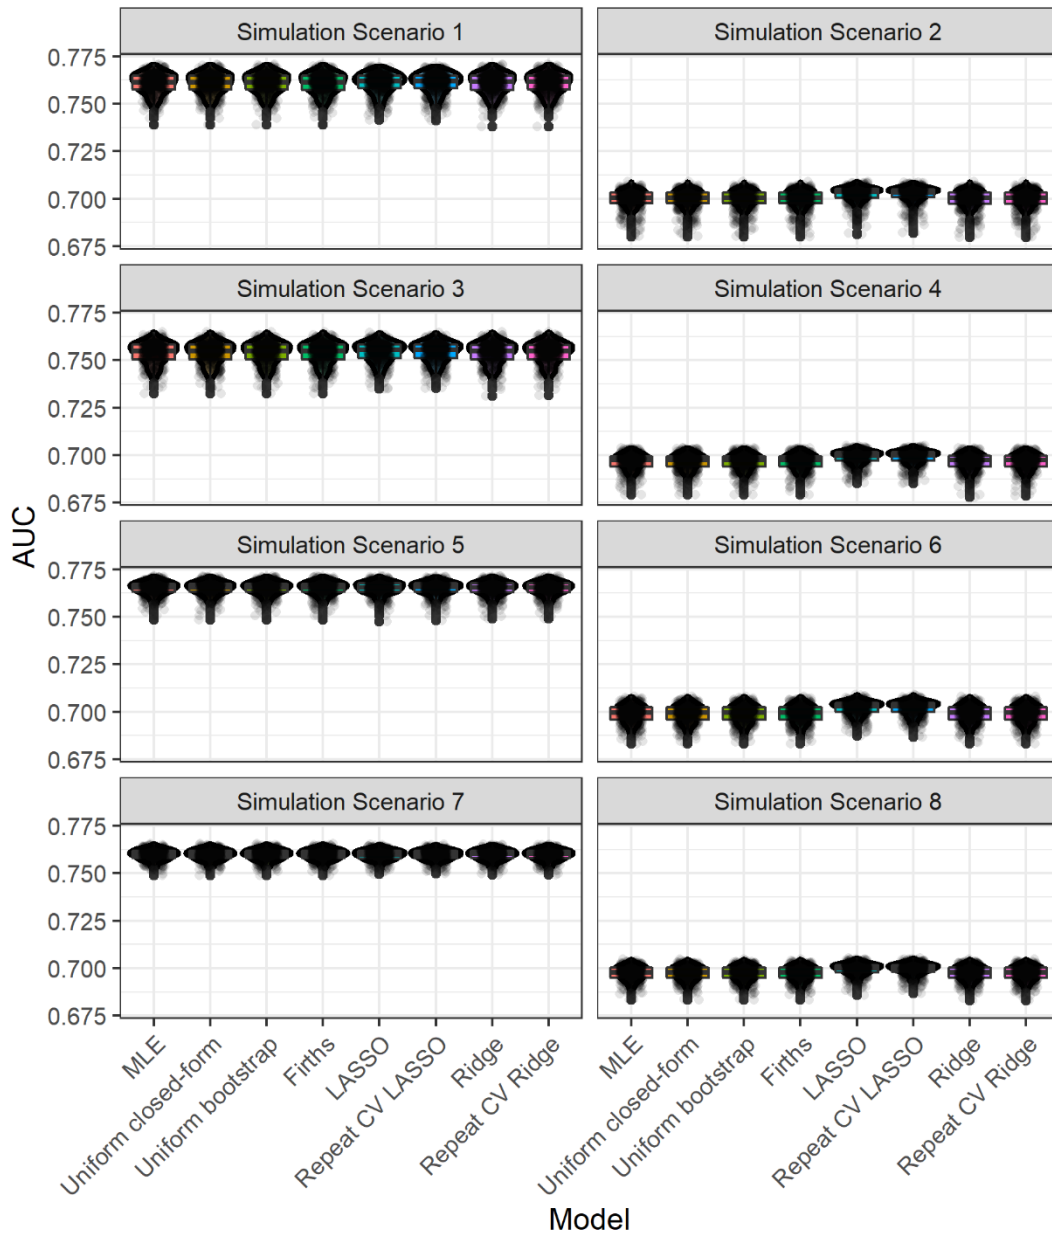

*Supplementary Figure 3: Boxplot and violin plot showing the distribution, across iterations, of the AUC, upon validation. Random jitter has been applied to each point to aid visual clarity. The numbering of simulation scenarios is given in Table 1.*

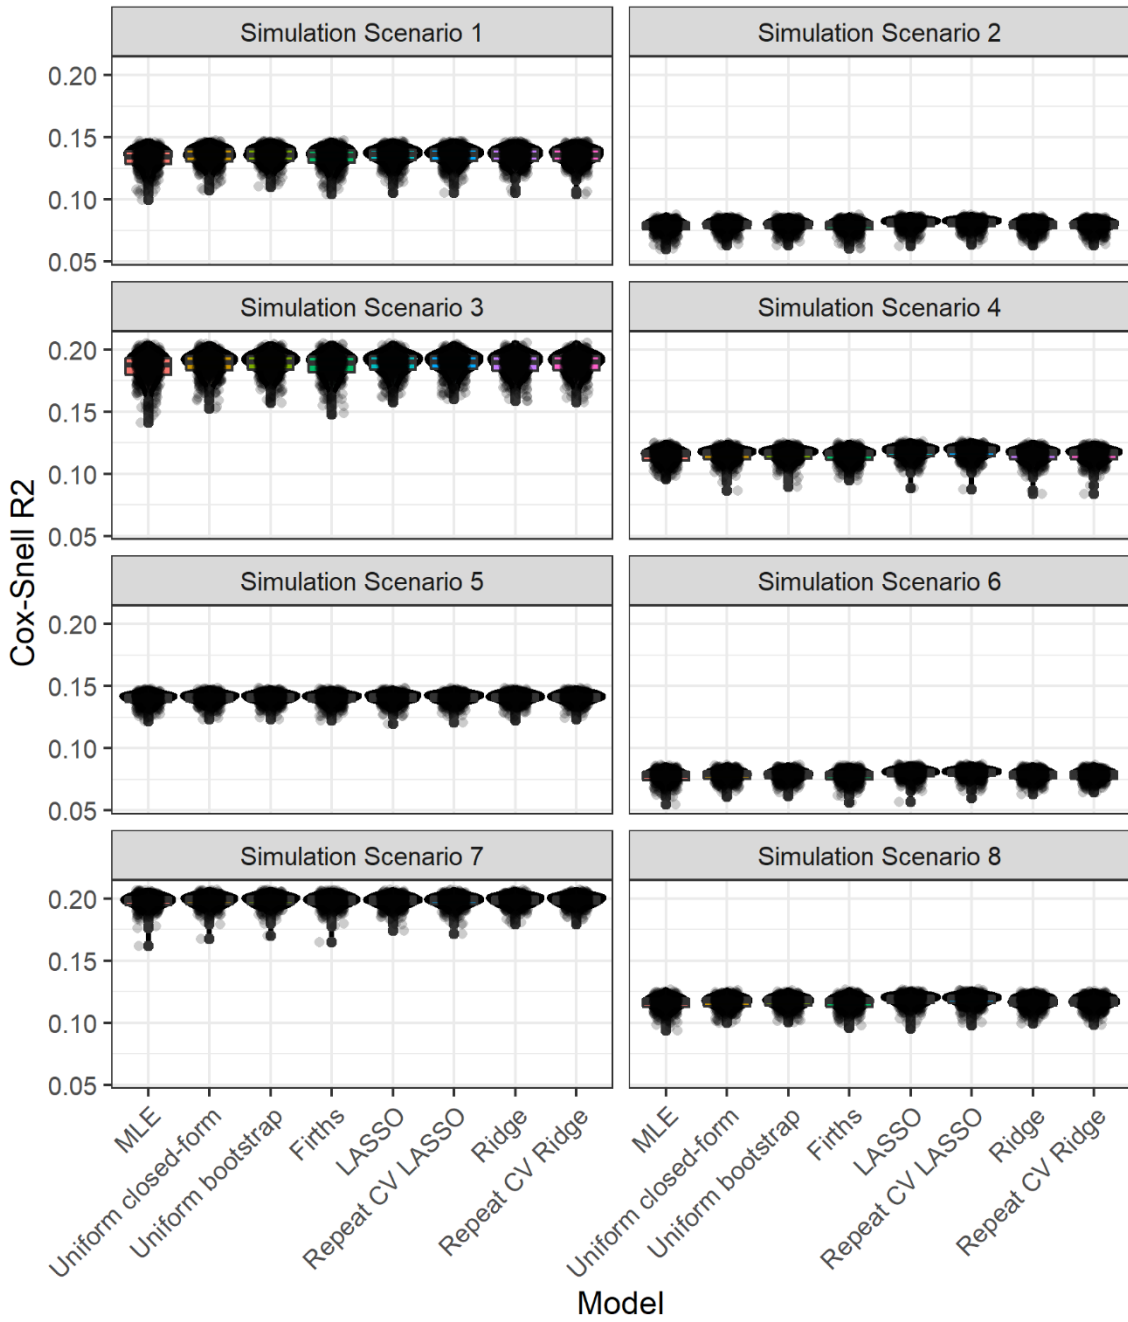

*Supplementary Figure 4: Boxplot and violin plot showing the distribution, across iterations, of the Cox-Snell R2, upon validation. Random jitter has been applied to each point to aid visual clarity. The numbering of simulation scenarios is given in Table 1.*



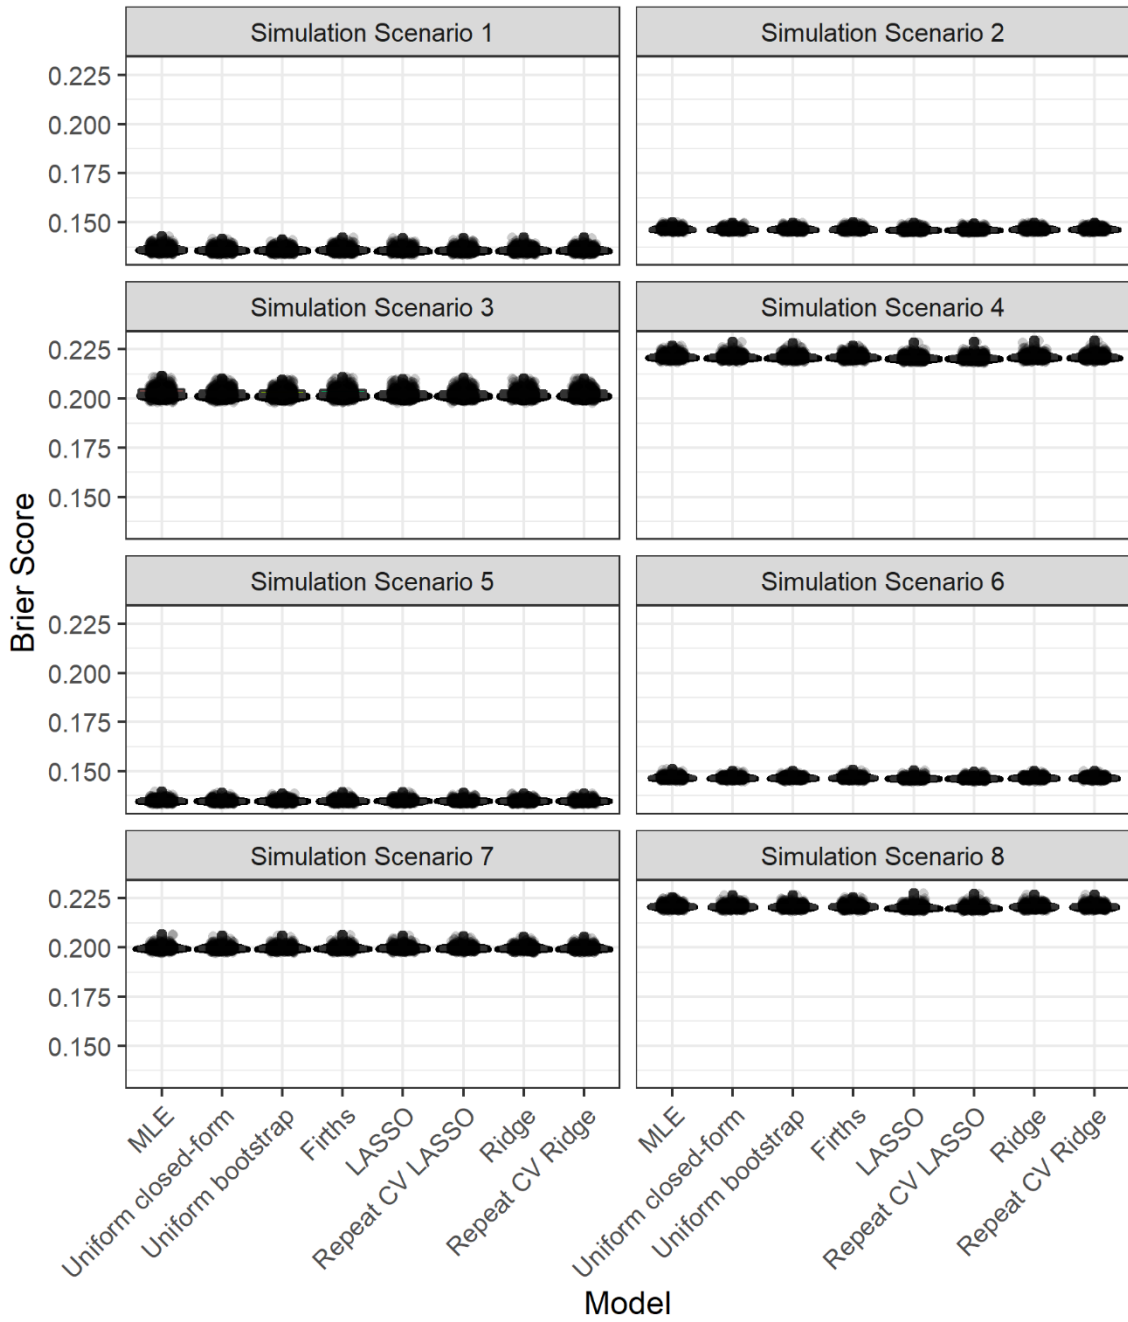

*Supplementary Figure 5: Boxplot and violin plot showing the distribution, across iterations, of the Brier Score, upon validation. Random jitter has been applied to each point to aid visual clarity. The numbering of simulation scenarios is given in Table 1.*
